# Supplementary material for: Serum-Free Culture System for Spontaneous Human Mesenchymal Stem Cell Spheroid Formation
Source: Hindawi journal article supplement (doi:10.1155/2019/6041816), 2019-10-15
Supplement: f1 [file 6041816.f1.pdf]

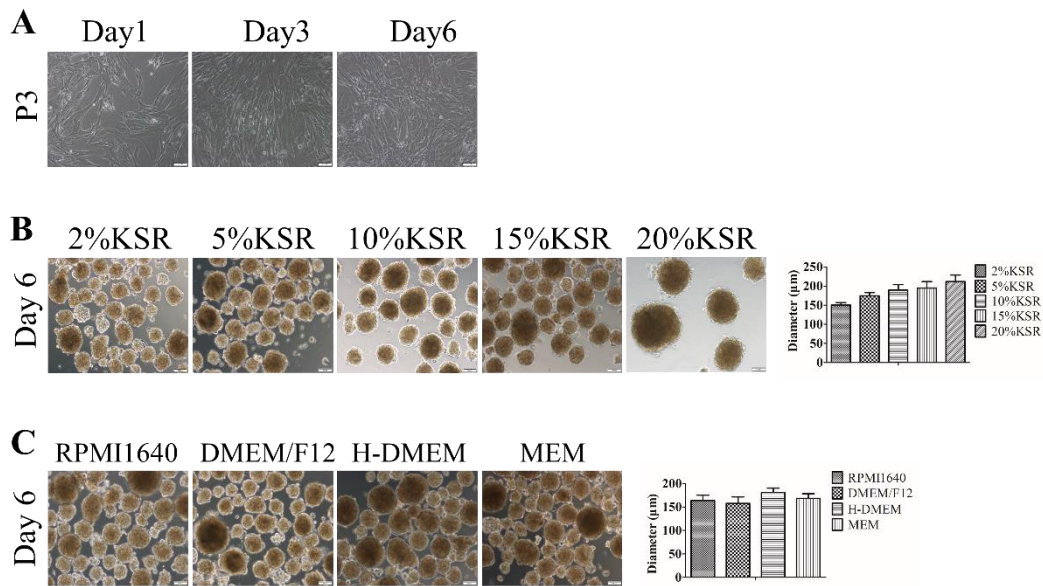

**Figure S1 MSC cells form spheroids in KSR containing medium.**

(A) Morphology of hMSCs cultured in L-FBS at passage 3 at day 1, 3 and 6; (B) hMSC spheroids at day 6 generated from hMSCs at passage 3 in L-DMEM at the indicated concentrations of KSR. Statistical analysis of spheroids diameter of hMSCs cultured in different concentrations of KSR in L-DMEM medium; (C) hMSC spheroids at day 6 generated from hMSCs at passage 3 in different basal medium, including RPMI1640, DMEM/F12, H-DMEM, MEM, with 20% KSR. Statistical analysis of spheroids diameter cultured of hMSCs cultured in different medium system. Spheroid diameters were measured from captured images ( $n = 12-20$ ), and values show mean  $\pm$  SD ( $n = 3$ ). Scale bars:  $100 \mu\text{m}$
