# Supplementary material for: Serum-Free Culture System for Spontaneous Human Mesenchymal Stem Cell Spheroid Formation
Source: Hindawi journal article supplement (doi:10.1155/2019/6041816), 2019-10-15
Supplement: f2 [file 6041816.f2.pdf]

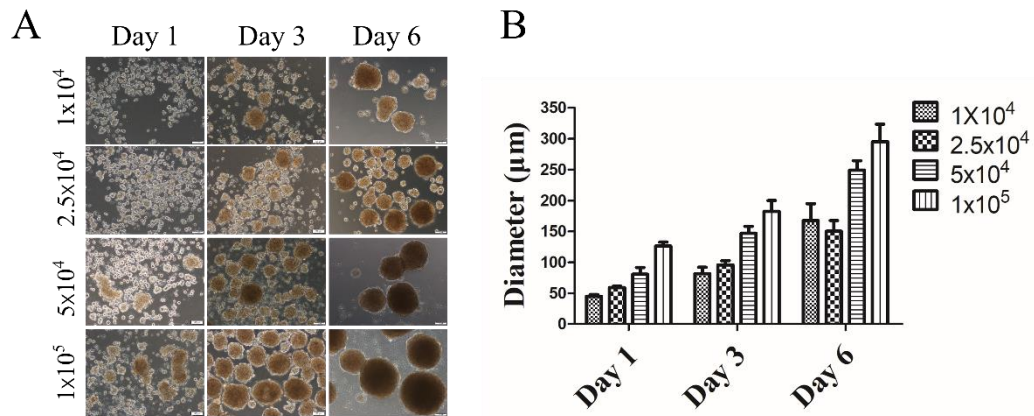

**Figure S2 MSCs form spheroids at different cell concentrations in 20% KSR containing medium.**

**(A)** hMSC spheroids generated from MSCs at passage 3 in L-DMEM with 20% KSR at different cell concentrations; **(B)** Statistic analysis of hMSC spheroids diameter cultured in different concentrations of KSR in L-DMEM medium. Spheroid diameters were measured from captured images ( $n = 12-20$ ), and values show mean  $\pm$  SD ( $n = 3$ ). Scale bars: 100  $\mu\text{m}$
